# Supplementary material for: Endogenous Cortisol Levels, Sleep or Vigilance: Which Factors Contribute to Better Exposure Therapy Outcomes in the Morning?
Source: Springer Nature journal article supplement (doi:10.1007/s10608-023-10463-9), 2024-02-20
Supplement: MOESM1 [file 26758118]

**Pre-post analyses**

**Table S1**

*Descriptive statistics of BAT scores separately for groups and sex.*

| *Group* | *Sex* | *Time* | *Mean* | *Std. Error* | *95% Confidence Interval* | |
| --- | --- | --- | --- | --- | --- | --- |
| *Lower Bound* | *Upper Bound* |
| Morning group | female | Pre-exposure | 2.143 | .283 | 1.576 | 2.710 |
| Post-exposure | 3.607 | .393 | 2.820 | 4.394 |
| Follow-up 1 | 4.464 | .494 | 3.475 | 5.454 |
| Follow-up 2 | 5.464 | .521 | 4.420 | 6.508 |
| male | Pre-exposure | 2.750 | .749 | 1.250 | 4.250 |
| Post-exposure | 3.500 | 1.040 | 1.417 | 5.583 |
| Follow-up 1 | 3.500 | 1.307 | .882 | 6.118 |
| Follow-up 2 | 4.000 | 1.379 | 1.238 | 6.762 |
| Evening group | female | Pre-exposure | 2.136 | .319 | 1.497 | 2.776 |
| Post-exposure | 4.045 | .443 | 3.157 | 4.934 |
| Follow-up 1 | 4.864 | .557 | 3.747 | 5.980 |
| Follow-up 2 | 5.545 | .588 | 4.368 | 6.723 |
| male | Pre-exposure | 3.167 | .611 | 1.942 | 4.391 |
| Post-exposure | 5.500 | .849 | 3.799 | 7.201 |
| Follow-up 1 | 7.000 | 1.067 | 4.862 | 9.138 |
| Follow-up 2 | 9.333 | 1.126 | 7.078 | 11.588 |

Note. BAT = Behavioral approach test, Std. Error = Standard Error.

**Table S2**

*Descriptive statistics of SNAQ scores separately for groups and sex.*

| *Group* | *Sex* | *Time* | *Mean* | *Std. Error* | *95% Confidence Interval* | |
| --- | --- | --- | --- | --- | --- | --- |
| *Lower Bound* | *Upper Bound* |
| Morning group | female | Pre-exposure | 20.097 | .677 | 18.746 | 21.448 |
| Post-exposure | 19.000 | .727 | 17.549 | 20.451 |
| Follow-up 1 | 16.613 | .889 | 14.839 | 18.387 |
| Follow-up 2 | 15.710 | .936 | 13.841 | 17.578 |
| male | Pre-exposure | 16.200 | 1.686 | 12.836 | 19.564 |
| Post-exposure | 20.600 | 1.810 | 16.988 | 24.212 |
| Follow-up 1 | 17.600 | 2.213 | 13.184 | 22.016 |
| Follow-up 2 | 17.000 | 2.331 | 12.348 | 21.652 |
| Evening group | female | Pre-exposure | 21.138 | .700 | 19.741 | 22.535 |
| Post-exposure | 20.034 | .751 | 18.535 | 21.534 |
| Follow-up 1 | 16.897 | .919 | 15.063 | 18.730 |
| Follow-up 2 | 16.345 | .968 | 14.413 | 18.277 |
| male | Pre-exposure | 19.833 | 1.539 | 16.762 | 22.905 |
| Post-exposure | 18.167 | 1.652 | 14.869 | 21.464 |
| Follow-up 1 | 15.167 | 2.020 | 11.135 | 19.198 |
| Follow-up 2 | 11.833 | 2.128 | 7.587 | 16.080 |

Note. SNAQ = Snake Anxiety Questionnaire, Std. Error = Standard Error.

**Table S3**

*Multilevel models assessing the impact of group on BAT.*

|  | **BAT** | | | **BAT** | | |
| --- | --- | --- | --- | --- | --- | --- |
| *Predictors* | *Estimates* | *CI* | *p* | *Estimates* | *CI* | *p* |
| (Intercept) | 2.53 | 2.17 – 2.89 | **<0.001** | 2.53 | 2.17 – 2.89 | **<0.001** |
| Time | 1.11 | 0.88 – 1.33 | **<0.001** | 1.11 | 0.89 – 1.33 | **<0.001** |
| Group |  |  |  | 0.47 | -0.25 – 1.18 | 0.199 |
| Time * Group |  |  |  | 0.41 | -0.03 – 0.86 | 0.066 |
| **Random Effects** | | | | | | |
| σ2 | 0.89 | | | 0.89 | | |
| τ00 | 1.74 ID | | | 1.72 ID | | |
| τ11 | 0.73 ID.Time | | | 0.71 ID.Time | | |
| ρ01 | 0.28 ID | | | 0.25 ID | | |
| ICC | 0.85 | | | 0.85 | | |
| N | 71 ID | | | 71 ID | | |
| Observations | 273 | | | 273 | | |
| Marginal R2 / Conditional R2 | 0.203 / 0.883 | | | 0.245 / 0.884 | | |

Note. BAT = Behavioral approach test, CI = Confidence Interval.

**Table S4**

*Multilevel models assessing the impact of group on SNAQ.*

|  | **SNAQ** | | | **SNAQ** | | |
| --- | --- | --- | --- | --- | --- | --- |
| *Predictors* | *Estimates* | *CI* | *p* | *Estimates* | *CI* | *p* |
| (Intercept) | 20.46 | 19.66 – 21.27 | **<0.001** | 20.46 | 19.66 – 21.27 | **<0.001** |
| Time | -1.63 | -2.05 – -1.21 | **<0.001** | -1.63 | -2.04 – -1.21 | **<0.001** |
| Group |  |  |  | 1.20 | -0.40 – 2.80 | 0.142 |
| Time * Group |  |  |  | -0.57 | -1.40 – 0.27 | 0.181 |
| **Random Effects** | | | | | | |
| σ2 | 6.12 | | | 6.12 | | |
| τ00 | 7.65 ID | | | 7.45 ID | | |
| τ11 | 1.99 ID.Time | | | 1.95 ID.Time | | |
| ρ01 | 0.00 ID | | | 0.04 ID | | |
| ICC | 0.71 | | | 0.71 | | |
| N | 71 ID | | | 71 ID | | |
| Observations | 284 | | | 284 | | |
| Marginal R2 / Conditional R2 | 0.138 / 0.746 | | | 0.142 / 0.749 | | |

Note. SNAQ = Snake Anxiety Questionnaire, CI = Confidence Interval.

*Prediction analysis*

**Table S5**

*Multilevel models assessing the impact of vigilance as predictor of BAT.*

|  | **BAT** | | | **BAT** | | |
| --- | --- | --- | --- | --- | --- | --- |
| *Predictors* | *Estimates* | *CI* | *p* | *Estimates* | *CI* | *p* |
| (Intercept) | 2.54 | 2.18 – 2.91 | **<0.001** | 2.54 | 2.18 – 2.91 | **<0.001** |
| Time | 1.11 | 0.88 – 1.34 | **<0.001** | 1.11 | 0.90 – 1.33 | **<0.001** |
| PVT |  |  |  | -0.00 | -0.02 – 0.01 | 0.448 |
| Time * PVT |  |  |  | -0.01 | -0.02 – -0.00 | **0.003** |
| **Random Effects** | | | | | | |
| σ2 | 0.90 | | | 0.90 | | |
| τ00 | 1.75 ID | | | 1.76 ID | | |
| τ11 | 0.75 ID.Time | | | 0.65 ID.Time | | |
| ρ01 | 0.28 ID | | | 0.25 ID | | |
| ICC | 0.85 | | | 0.84 | | |
| N | 70 ID | | | 70 ID | | |
| Observations | 269 | | | 269 | | |
| Marginal R2 / Conditional R2 | 0.202 / 0.883 | | | 0.265 / 0.884 | | |

Note. BAT = Behavioral approach test, PVT = Psychomotor vigilance task, CI = Confidence Interval.

*Moderation analyses*

**Table S6**

*Multilevel models assessing the impact of sleep quality as a moderator of group effects on BAT.*

|  | **BAT** | | | **BAT** | | | **BAT** | | |
| --- | --- | --- | --- | --- | --- | --- | --- | --- | --- |
| *Predictors* | *Estimates* | *CI* | *p* | *Estimates* | *CI* | *p* | *Estimates* | *CI* | *p* |
| (Intercept) | 2.71 | 2.25 – 3.16 | **<0.001** | 2.70 | 2.26 – 3.14 | **<0.001** | 2.77 | 2.36 – 3.19 | **<0.001** |
| Time | 1.18 | 0.87 – 1.48 | **<0.001** | 1.18 | 0.87 – 1.48 | **<0.001** | 1.15 | 0.85 – 1.46 | **<0.001** |
| TST |  |  |  | 0.00 | -0.00 – 0.01 | 0.283 |  |  |  |
| Group |  |  |  | -0.43 | -1.32 – 0.45 | 0.337 | -0.38 | -1.22 – 0.46 | 0.375 |
| Time * TST |  |  |  | -0.00 | -0.00 – 0.00 | 0.920 |  |  |  |
| Time * Group |  |  |  | 0.50 | -0.11 – 1.12 | 0.107 | 0.47 | -0.14 – 1.08 | 0.130 |
| TST * Group |  |  |  | 0.01 | 0.00 – 0.02 | **0.049** |  |  |  |
| (Time * TST) * Group |  |  |  | -0.00 | -0.01 – 0.00 | 0.343 |  |  |  |
| SE |  |  |  |  |  |  | -0.00 | -0.06 – 0.06 | 0.987 |
| Time * SE |  |  |  |  |  |  | -0.01 | -0.05 – 0.03 | 0.702 |
| SE * Group |  |  |  |  |  |  | 0.17 | 0.06 – 0.29 | **0.003** |
| (Time * SE) * Group |  |  |  |  |  |  | -0.05 | -0.13 – 0.03 | 0.217 |
| **Random Effects** | | | | | | | | | |
| σ2 | 0.59 | | | 0.59 | | | 0.59 | | |
| τ00 | 1.54 ID | | | 1.40 ID | | | 1.21 ID | | |
| τ11 | 0.74 ID.Time | | | 0.74 ID.Time | | | 0.71 ID.Time | | |
| ρ01 | -0.12 ID | | | -0.03 ID | | | 0.04 ID | | |
| ICC | 0.86 | | | 0.87 | | | 0.86 | | |
| N | 37 ID | | | 37 ID | | | 37 ID | | |
| Observations | 142 | | | 142 | | | 142 | | |
| Marginal R2 / Conditional R2 | 0.289 / 0.901 | | | 0.305 / 0.907 | | | 0.318 / 0.906 | | |

Note. BAT = Behavioral Approach Test, TST = total sleep Time, SE = sleep efficiency, CI = Confidence Interval.

**Table S7**

*Simple slopes for SE and BAT scores at Time level 0*

|  | **BAT** | | | | |
| --- | --- | --- | --- | --- | --- |
| *Group* | *Estimates* | *SE* | *T-value* | *Df* | *p* |
| Morning | -0.08 | 0.04 | 1.93 | 33 | 0.062 |
| Evening | 0.10 | 0.04 | 2.29 | 33 | **0.029** |

Note. BAT = Behavioral Approach Test

**Table S8**

*Multilevel models assessing the impact of mean arousal levels as a moderator of group effects on BAT.*

|  | **BAT** | | | **BAT** | | |
| --- | --- | --- | --- | --- | --- | --- |
| *Predictors* | *Estimates* | *CI* | *p* | *Estimates* | *CI* | *p* |
| (Intercept) | 2.54 | 2.18 – 2.90 | **<0.001** | 2.56 | 2.21 – 2.91 | **<0.001** |
| Time | 1.11 | 0.88 – 1.34 | **<0.001** | 1.07 | 0.83 – 1.31 | **<0.001** |
| Arousal |  |  |  | -0.34 | -0.52 – -0.15 | **0.001** |
| Group |  |  |  | 0.23 | -0.46 – 0.93 | 0.512 |
| Time × Arousal |  |  |  | 0.02 | -0.11 – 0.15 | 0.809 |
| Time × Group |  |  |  | 0.41 | -0.07 – 0.89 | 0.095 |
| Arousal × Group |  |  |  | 0.08 | -0.30 – 0.46 | 0.678 |
| (Time × Arousal) × Group |  |  |  | -0.13 | -0.39 – 0.13 | 0.339 |
| **Random Effects** | | | | | | |
| σ2 | 0.90 | | | 0.90 | | |
| τ00 | 1.69 ID | | | 1.33 ID | | |
| τ11 | 0.75 ID.Time | | | 0.74 ID.Time | | |
| ρ01 | 0.32 ID | | | 0.33 ID | | |
| ICC | 0.85 | | | 0.84 | | |
| N | 69 ID | | | 69 ID | | |
| Observations | 265 | | | 265 | | |
| Marginal R2 / Conditional R2 | 0.199 / 0.883 | | | 0.285 / 0.887 | | |

Note. BAT = Behavioral Approach Test, TST = total sleep time, SE = sleep efficiency, CI = Confidence Interval

**Table S9**

*Multilevel models assessing the impact of mean arousal levels as a moderator of group effects on SCAF.*

|  | **SCAF** | | | **SCAF** | | |
| --- | --- | --- | --- | --- | --- | --- |
| *Predictors* | *Estimates* | *CI* | *p* | *Estimates* | *CI* | *p* |
| (Intercept) | 20.42 | 19.59 – 21.24 | **<0.001** | 20.29 | 19.49 – 21.09 | **<0.001** |
| Time | -1.63 | -2.06 – -1.20 | **<0.001** | -1.59 | -2.05 – -1.14 | **<0.001** |
| Arousal |  |  |  | 0.72 | 0.28 – 1.15 | **0.001** |
| Group |  |  |  | 1.86 | 0.26 – 3.46 | **0.023** |
| Time × Arousal |  |  |  | 0.10 | -0.14 – 0.35 | 0.416 |
| Time × Group |  |  |  | -0.43 | -1.33 – 0.47 | 0.350 |
| Arousal × Group |  |  |  | -0.48 | -1.35 – 0.39 | 0.278 |
| (Time × Arousal) × Group |  |  |  | 0.15 | -0.34 – 0.64 | 0.542 |
| **Random Effects** | | | | | | |
| σ2 | 6.19 | | | 6.19 | | |
| τ00 | 7.72 ID | | | 6.07 ID | | |
| τ11 | 2.05 ID.Time | | | 2.07 ID.Time | | |
| ρ01 | 0.00 ID | | | -0.02 ID | | |
| ICC | 0.71 | | | 0.68 | | |
| N | 69 ID | | | 69 ID | | |
| Observations | 276 | | | 276 | | |
| Marginal R2 / Conditional R2 | 0.137 / 0.747 | | | 0.235 / 0.754 | | |

Note. SNAQ = Snake Anxiety Questionnaire, CI = Confidence Interval.

**Post-follow-up analyses**

**Table S10**

*Multilevel models assessing the impact of group on BAT.*

|  | **BAT** | | | **BAT** | | |
| --- | --- | --- | --- | --- | --- | --- |
| *Predictors* | *Estimates* | *CI* | *p* | *Estimates* | *CI* | *p* |
| (Intercept) | 3.87 | 3.36 – 4.38 | **<0.001** | 3.87 | 3.37 – 4.36 | **<0.001** |
| Time | 0.93 | 0.67 – 1.18 | **<0.001** | 0.93 | 0.67 – 1.18 | **<0.001** |
| Group |  |  |  | 1.08 | 0.09 – 2.07 | **0.033** |
| Time * Group |  |  |  | 0.24 | -0.27 – 0.75 | 0.347 |
| **Random Effects** | | | | | | |
| σ2 | 0.64 | | | 0.65 | | |
| τ00 | 4.16 ID | | | 3.92 ID | | |
| τ11 | 0.82 ID.Time | | | 0.82 ID.Time | | |
| ρ01 | 0.33 ID | | | 0.31 ID | | |
| ICC | 0.91 | | | 0.91 | | |
| N | 71 ID | | | 71 ID | | |
| Observations | 202 | | | 202 | | |
| Marginal R2 / Conditional R2 | 0.073 / 0.919 | | | 0.128 / 0.920 | | |

Note. BAT = Behavioral approach test, CI = Confidence Interval.

**Table S11**

*Multilevel models assessing the impact of group on SNAQ.*

|  | **SNAQ** | | | **SNAQ** | | |
| --- | --- | --- | --- | --- | --- | --- |
| *Predictors* | *Estimates* | *CI* | *p* | *Estimates* | *CI* | *p* |
| (Intercept) | 19.16 | 18.21 – 20.11 | **<0.001** | 19.16 | 18.20 – 20.11 | **<0.001** |
| Time | -1.87 | -2.34 – -1.39 | **<0.001** | -1.87 | -2.35 – -1.39 | **<0.001** |
| Group |  |  |  | 0.41 | -1.49 – 2.32 | 0.670 |
| Time * Group |  |  |  | -0.40 | -1.36 – 0.55 | 0.406 |
| **Random Effects** | | | | | | |
| σ2 | 4.34 | | | 4.34 | | |
| τ00 | 12.81 ID | | | 13.00 ID | | |
| τ11 | 2.00 ID.Time | | | 2.02 ID.Time | | |
| ρ01 | 0.21 ID | | | 0.22 ID | | |
| ICC | 0.81 | | | 0.81 | | |
| N | 71 ID | | | 71 ID | | |
| Observations | 213 | | | 213 | | |
| Marginal R2 / Conditional R2 | 0.093 / 0.826 | | | 0.093 / 0.828 | | |

Note. SNAQ = Snake Anxiety Questionnaire, CI = Confidence Interval.

*Prediction analyses*

**Table S12**

*Multilevel models assessing the impact of vigilance as a predictor of BAT.*

|  | **BAT** | | | **BAT** | | |
| --- | --- | --- | --- | --- | --- | --- |
| *Predictors* | *Estimates* | *CI* | *p* | *Estimates* | *CI* | *p* |
| (Intercept) | 3.88 | 3.37 – 4.40 | **<0.001** | 3.88 | 3.37 – 4.39 | **<0.001** |
| Time | 0.93 | 0.68 – 1.19 | **<0.001** | 0.94 | 0.69 – 1.18 | **<0.001** |
| Reaktionszeitaufgabe |  |  |  | -0.01 | -0.03 – 0.00 | 0.075 |
| Time * PVT |  |  |  | -0.01 | -0.02 – -0.00 | **0.011** |
| **Random Effects** | | | | | | |
| σ2 | 0.65 | | | 0.66 | | |
| τ00 | 4.20 ID | | | 4.05 ID | | |
| τ11 | 0.83 ID.Time | | | 0.73 ID.Time | | |
| ρ01 | 0.33 ID | | | 0.28 ID | | |
| ICC | 0.91 | | | 0.90 | | |
| N | 70 ID | | | 70 ID | | |
| Observations | 199 | | | 199 | | |
| Marginal R2 / Conditional R2 | 0.074 / 0.919 | | | 0.151 / 0.918 | | |

Note. BAT = Behavioral Approach Test, PVT = Psychomotor vigilance task, CI = Confidence Interval.

.

*Moderation analyses*

**Table S13**

*Multilevel models assessing the impact of sleep quality as a moderator of group effects on BAT.*

|  | **BAT** | | | | **BAT** | | |  | **BAT** | | |
| --- | --- | --- | --- | --- | --- | --- | --- | --- | --- | --- | --- |
| *Predictors* | *Estimates* | | *CI* | *p* | *Estimates* | *CI* | *p* |  | *Estimates* | *CI* | *p* |
| (Intercept) | 3.98 | | 3.43 – 4.53 | **<0.001** | 3.97 | 3.42 – 4.52 | **<0.001** |  | 4.03 | 3.49 – 4.57 | **<0.001** |
| Time | 1.10 | | 0.76 – 1.43 | **<0.001** | 1.10 | 0.76 – 1.43 | **<0.001** |  | 1.06 | 0.74 – 1.38 | **<0.001** |
| TST |  | |  |  | 0.01 | -0.00 – 0.01 | 0.166 |  |  |  |  |
| Group |  | |  |  | 0.07 | -1.04 – 1.17 | 0.906 |  | 0.10 | -0.99 – 1.19 | 0.851 |
| Time * TST |  | |  |  | -0.00 | -0.01 – 0.00 | 0.363 |  |  |  |  |
| Time * Group |  | |  |  | 0.46 | -0.21 – 1.13 | 0.179 |  | 0.40 | -0.25 – 1.05 | 0.224 |
| TST * Group |  | |  |  | 0.01 | -0.00 – 0.03 | 0.183 |  |  |  |  |
| (Time * TST) * Group |  | |  |  | -0.01 | -0.02 – 0.00 | 0.225 |  |  |  |  |
| SE |  | |  |  |  |  |  |  | 0.01 | -0.07 – 0.08 | 0.862 |
| Time * SE |  | |  |  |  |  |  |  | -0.02 | -0.06 – 0.02 | 0.380 |
| SE * Group |  | |  |  |  |  |  |  | 0.17 | 0.02 – 0.31 | **0.027** |
| (Time * SE) * Group |  | |  |  |  |  |  |  | -0.09 | -0.18 – -0.00 | **0.047** |
| **Random Effects** | |  | | | | | | | | | |
| σ2 | 0.70 | | | | 0.69 | | |  | 0.68 | | |
| τ00 | 2.23 ID | | | | 2.19 ID | | |  | 2.10 ID | | |
| τ11 | 0.63 ID.Time | | | | 0.62 ID.Time | | |  | 0.56 ID.Time | | |
| ρ01 | 0.43 ID | | | | 0.57 ID | | |  | 0.66 ID | | |
| ICC | 0.86 | | | | 0.87 | | |  | 0.87 | | |
| N | 37 ID | | | | 37 ID | | |  | 37 ID | | |
| Observations | 105 | | | | 105 | | |  | 105 | | |
| Marginal R2 / Conditional R2 | 0.140 / 0.877 | | | | 0.162 / 0.888 | | |  | 0.173 / 0.889 | | |

Note. BAT = Behavioral Approach Test, TST = total sleep Time, SE = sleep efficiency, CI = Confidence Interval.

**Table S14**

*Simple slopes for different levels of SE and Groups*

|  |  | **BAT** | | | | |
| --- | --- | --- | --- | --- | --- | --- |
| *SE* | *Group* | *Estimates* | *SE* | *T-value* | *Df* | *p* |
| Mean + 2 SD | Morning | 1.17 | 0.47 | 2.48 | 64 | **0.016** |
| Mean + 2 SD | Evening | 0.26 | 0.58 | 0.44 | 64 | 0.661 |
| Mean - 2 SD | Morning | 0.61 | 0**.**50 | 1.21 | 64 | 0.230 |
| Mean - 2 SD | Evening | 2.32 | 0.51 | 4.54 | 64 | **<0.001** |

Note. BAT = Behavioral Approach Test, SE = Sleep efficiency

**Figure S1**

*Distribution of pre-exposure sleep efficiency across both groups (in %)*


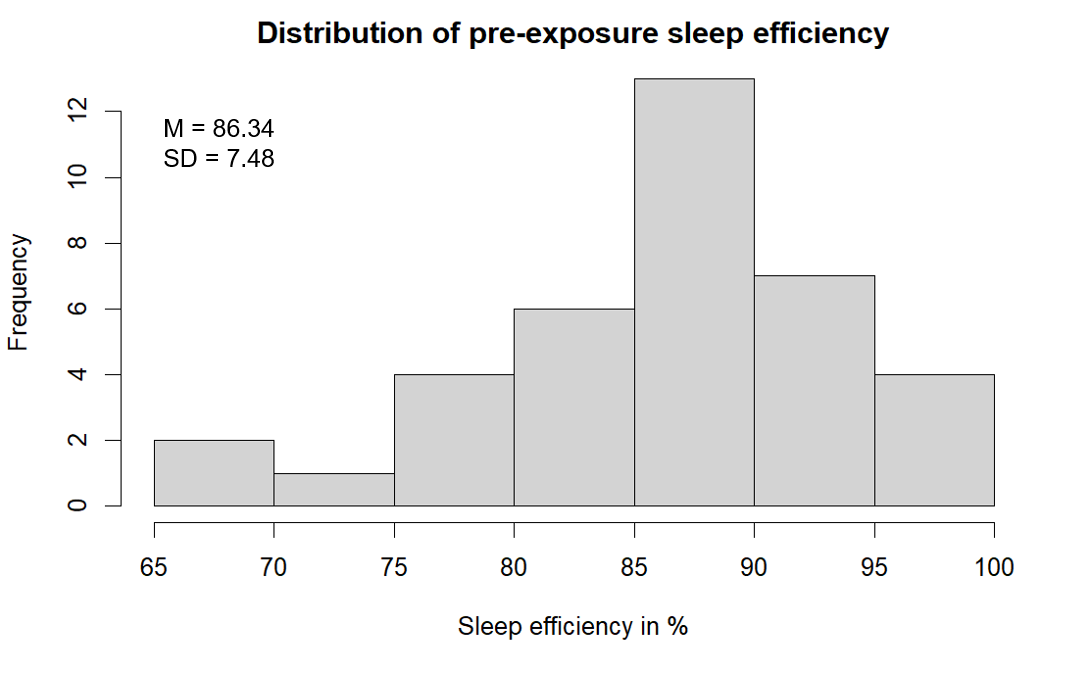


**Table S15**

*Multilevel models assessing the impact of mean arousal levels as a moderator of group effects on BAT.*

|  | **BAT** | | | **BAT** | | |
| --- | --- | --- | --- | --- | --- | --- |
| *Predictors* | *Estimates* | *CI* | *p* | *Estimates* | *CI* | *p* |
| (Intercept) | 3.87 | 3.35 – 4.39 | **<0.001** | 3.85 | 3.34 – 4.35 | **<0.001** |
| Time | 0.93 | 0.66 – 1.19 | **<0.001** | 0.90 | 0.62 – 1.18 | **<0.001** |
| Arousal |  |  |  | -0.39 | -0.66 – -0.11 | **0.006** |
| Group |  |  |  | 0.76 | -0.25 – 1.77 | 0.140 |
| Time × Arousal |  |  |  | 0.06 | -0.09 – 0.21 | 0.408 |
| Time × Group |  |  |  | 0.30 | -0.26 – 0.85 | 0.292 |
| Arousal × Group |  |  |  | -0.11 | -0.66 – 0.44 | 0.702 |
| (Time × Arousal) × Group |  |  |  | -0.09 | -0.39 – 0.21 | 0.553 |
| **Random Effects** | | | | | | |
| σ2 | 0.64 | | | 0.64 | | |
| τ00 | 4.26 ID | | | 3.60 ID | | |
| τ11 | 0.85 ID.Time | | | 0.88 ID.Time | | |
| ρ01 | 0.34 ID | | | 0.38 ID | | |
| ICC | 0.92 | | | 0.91 | | |
| N | 69 ID | | | 69 ID | | |
| Observations | 196 | | | 196 | | |
| Marginal R2 / Conditional R2 | 0.071 / 0.922 | | | 0.175 / 0.925 | | |

Note. BAT = Behavioral Approach Test, TST = total sleep time, SE = sleep efficiency, CI = Confidence Interval

**Table S14**

*Multilevel models assessing the impact of mean arousal levels as a moderator of group effects on SCAF.*

|  | **SCAF** | | | **SCAF** | | |
| --- | --- | --- | --- | --- | --- | --- |
| *Predictors* | *Estimates* | *CI* | *p* | *Estimates* | *CI* | *p* |
| (Intercept) | 19.07 | 18.10 – 20.03 | **<0.001** | 19.05 | 18.14 – 19.97 | **<0.001** |
| Time | -1.85 | -2.34 – -1.36 | **<0.001** | -1.86 | -2.39 – -1.34 | **<0.001** |
| Arousal |  |  |  | 1.05 | 0.55 – 1.54 | **<0.001** |
| Group |  |  |  | 1.43 | -0.40 – 3.27 | 0.125 |
| Time × Arousal |  |  |  | -0.07 | -0.35 – 0.21 | 0.633 |
| Time × Group |  |  |  | -0.43 | -1.47 – 0.61 | 0.414 |
| Arousal × Group |  |  |  | -0.04 | -1.04 – 0.96 | 0.938 |
| (Time × Arousal) × Group |  |  |  | -0.06 | -0.63 – 0.50 | 0.824 |
| **Random Effects** | | | | | | |
| σ2 | 4.38 | | | 4.38 | | |
| τ00 | 12.85 ID | | | 10.00 ID | | |
| τ11 | 2.06 ID.Time | | | 2.20 ID.Time | | |
| ρ01 | 0.23 ID | | | 0.30 ID | | |
| ICC | 0.81 | | | 0.79 | | |
| N | 69 ID | | | 69 ID | | |
| Observations | 207 | | | 207 | | |
| Marginal R2 / Conditional R2 | 0.090 / 0.827 | | | 0.202 / 0.832 | | |

Note. SNAQ = Snake Anxiety Questionnaire, CI = Confidence Interval.
